# Supplementary material for: Social Network Characteristics and Depressive Symptoms of Italian Public Health Medical Residents: The Public Health Residents’ Anonymous Survey in Italy (PHRASI)
Source: MDPI journal article supplement (doi:10.3390/bs13110881), 2023-10-25
Supplement: s1 [file s1]

**Supplementary Table S1.** Cronbach's  $\alpha$  values for each adopted questionnaire derived from literature and estimated in the current study.

| Questionnaire                                 | Acronym | Cronbach's $\alpha$ from original validation study | Cronbach's $\alpha$ from current study |
|-----------------------------------------------|---------|----------------------------------------------------|----------------------------------------|
| Patient Health Questionnaire -9               | PHQ-9   | 0.89                                               | 0.88                                   |
| Alcohol Use Disorders Identification Test     | AUDIT-C | 0.80                                               | 0.63                                   |
| International Physical Activity Questionnaire | IPAQ    | 0.67                                               | 0.66                                   |
| WHO-5 wellbeing index                         | WHO-5   | 0.86                                               | 0.85                                   |
| Work Related Stress Questionnaire             | WRSQ    | 0.88                                               | 0.80                                   |

**Supplementary Table S2.** Descriptive statistics (mean, SD, skewness, kurtosis) of continuous variables.

| Variable                          | Mean   | Standard Deviation | Skewness | Kurtosis | Standard Error |
|-----------------------------------|--------|--------------------|----------|----------|----------------|
| Age                               | 31.61  | 4.49               | 1.54     | 3.58     | 0.23           |
| Distance                          | 120.83 | 245.07             | 2.19     | 3.99     | 12.59          |
| Sociality                         | 2.58   | 1.24               | -0.09    | -0.75    | 0.06           |
| Peer-to-Peer Support              | 3.90   | 1.01               | -0.95    | 0.58     | 0.05           |
| Supervisor Support                | 3.51   | 1.08               | -0.56    | -0.35    | 0.06           |
| Work-to-private-life interference | 2.66   | 1.02               | 0.21     | -0.46    | 0.05           |

**Supplementary Figure S1.** Distribution of continuous variables.

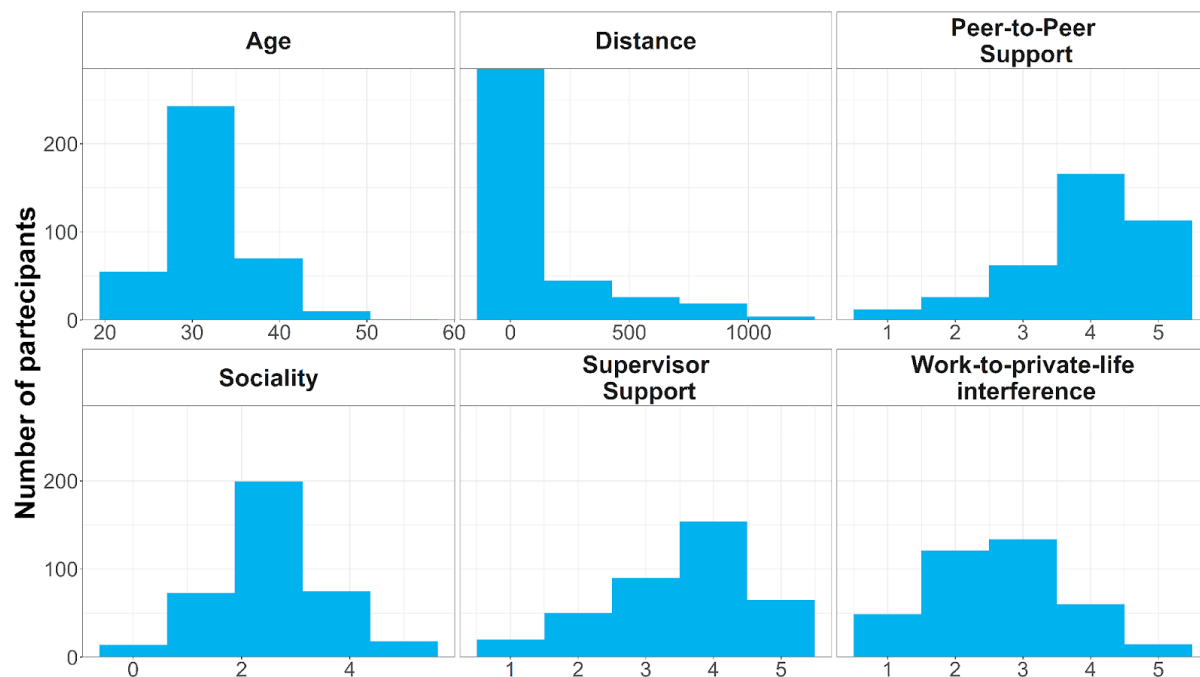

**Supplementary Table S3. Correlation matrix of the predictor variables. Kendall's tau correlation coefficient test was used**

|                                         | Sex   | Age   | Distance | Social participation | Family Members | Having a partner | Cohabitation | Peer-to-Peer Support | Supervisor Support | Work-to-private-life interference (WLI) |
|-----------------------------------------|-------|-------|----------|----------------------|----------------|------------------|--------------|----------------------|--------------------|-----------------------------------------|
| Sex                                     | 1.00  | -0.02 | 0.06     | 0.05                 | -0.07          | 0.02             | -0.09        | 0.03                 | 0.07               | -0.06                                   |
| Age                                     | -0.02 | 1.00  | -0.12    | -0.07                | 0.20           | 0.06             | 0.01         | -0.10                | -0.02              | 0.11                                    |
| Distance                                | 0.06  | -0.12 | 1.00     | 0.09                 | -0.14          | -0.06            | -0.13        | 0.03                 | 0.03               | -0.03                                   |
| Social participation                    | 0.05  | -0.07 | 0.09     | 1.00                 | 0.10           | 0.11             | 0.09         | 0.14                 | 0.22               | -0.07                                   |
| Family Members                          | -0.07 | 0.20  | -0.14    | 0.10                 | 1.00           | 0.67             | 0.48         | -0.02                | 0.00               | 0.08                                    |
| Having a partner                        | 0.02  | 0.06  | -0.06    | 0.11                 | 0.67           | 1.00             | 0.36         | 0.03                 | 0.03               | 0.05                                    |
| Cohabitation                            | -0.09 | 0.01  | -0.13    | 0.09                 | 0.48           | 0.36             | 1.00         | -0.02                | -0.08              | -0.02                                   |
| Peer-to-Peer Support                    | 0.03  | -0.10 | 0.03     | 0.14                 | -0.02          | 0.03             | -0.02        | 1.00                 | 0.42               | -0.11                                   |
| Supervisor Support                      | 0.07  | -0.02 | 0.03     | 0.22                 | 0.00           | 0.03             | -0.08        | 0.42                 | 1.00               | -0.15                                   |
| Work-to-private-life interference (WLI) | -0.06 | 0.11  | -0.03    | -0.07                | 0.08           | 0.05             | -0.02        | -0.11                | -0.15              | 1.00                                    |

**Supplementary Table S4. Logistic regressions assessing the association between social network characteristics and mild to severe depressive symptoms.**

|                                                     | PHQ score $\geq 5$ |                   |                  |
|-----------------------------------------------------|--------------------|-------------------|------------------|
| Characteristic                                      | OR                 | 95% CI            | p                |
| <i>Functional characteristics of social network</i> |                    |                   |                  |
| Peer-to-Peer Support                                | <b>0.64</b>        | <b>0.50; 0.81</b> | <b>&lt;0.001</b> |
| Supervisor Support                                  | <b>0.62</b>        | <b>0.50; 0.76</b> | <b>&lt;0.001</b> |
| Work-to-private-life interference (WLI)             | <b>1.64</b>        | <b>1.31; 2.04</b> | <b>&lt;0.001</b> |
| <i>Structural characteristics of social network</i> |                    |                   |                  |
| Distance                                            | 1.00               | 1.00; 1.00        | 0.059            |
| Family Members                                      | 1.02               | 0.76; 1.37        | 0.880            |
| Having a partner (ref. = No)                        | <b>0.70</b>        | <b>0.43; 1.12</b> | <b>0.139</b>     |
| Cohabitation (ref. = Alone)                         | 0.91               | 0.57; 1.47        | 0.706            |
| Social participation                                | <b>0.44</b>        | <b>0.35; 0.54</b> | <b>&lt;0.001</b> |
